# Supplementary material for: Asymmetric Dynamic Attunement of Speech and Gestures in the Construction of Children’s Understanding
Source: Front Psychol. 2016 Mar 31;7:473. doi: 10.3389/fpsyg.2016.00473 (PMC4814764; doi:10.3389/fpsyg.2016.00473)
Supplement: Supplementary file 2 [file Data_Sheet_2.XLSX]

## Sheet: Correlation table
Full correlation table
		Age months	Math score	Language score	Average prev. measurements	%Sync	RR_LOS	Q_LOS	PEAK_LOS	tau	S-RR	S-LAM-V	S-TT-V	S-MaxVL	S-LAM-H	S-TT-H	S-MaxHL	S-LAM V-H	S-TT V-H	S-Max L V-H	R-RR	R-LAM-V	R-TT-V	R-MaxVL	R-LAM-H	R-TT-H	R-MaxHL	R-LAM V-H	R-TT V-H	R-Max L V-H
Age months	Pearson Correlation	1	-0.274	-0.205	0.178	0.565	0.083	0.484	0.286	-0.604	0.107	-0.259	-0.075	-0.126	-0.31	0.401	0.345	-0.049	-0.243	-0.194	0.248	0.274	0.511	0.414	0.11	0.207	-0.075	0.649	0.115	0.522
	Sig. (2-tailed)		0.389	0.545	0.581	0.056	0.799	0.111	0.368	0.037	0.74	0.417	0.818	0.697	0.327	0.197	0.273	0.881	0.446	0.545	0.438	0.388	0.089	0.181	0.733	0.518	0.818	0.022	0.723	0.082
Math score	Pearson Correlation	-0.274	1	0.836	0.842	0.095	0.338	-0.098	0.261	-0.351	-0.271	-0.539	0.348	0.12	-0.447	-0.105	-0.305	-0.621	0.231	0.08	0.364	0.51	0.14	0.097	0.615	0.455	0.562	-0.133	-0.683	-0.502
	Sig. (2-tailed)	0.389		0.001	0.001	0.769	0.283	0.762	0.413	0.263	0.394	0.071	0.268	0.709	0.145	0.746	0.335	0.031	0.471	0.805	0.245	0.09	0.664	0.763	0.033	0.137	0.057	0.681	0.014	0.096
Language score	Pearson Correlation	-0.205	0.836	1	0.663	0.173	0.412	-0.072	0.279	-0.449	-0.2	-0.495	0.533	0.296	-0.52	-0.357	-0.482	-0.308	0.591	0.367	0.372	0.485	0.25	0.129	0.565	0.366	0.478	-0.076	-0.455	-0.27
	Sig. (2-tailed)	0.545	0.001		0.026	0.611	0.208	0.833	0.406	0.166	0.556	0.122	0.091	0.376	0.101	0.281	0.133	0.356	0.055	0.267	0.259	0.131	0.458	0.705	0.07	0.269	0.137	0.824	0.16	0.423
Average prev. measurements	Pearson Correlation	0.178	0.842	0.663	1	0.185	0.213	0.242	0.204	-0.691	-0.208	-0.582	0.204	-0.013	-0.518	0.132	-0.105	-0.578	0.009	-0.058	0.261	0.556	0.357	0.355	0.54	0.528	0.402	0.281	-0.674	-0.156
	Sig. (2-tailed)	0.581	0.001	0.026		0.564	0.507	0.448	0.526	0.013	0.517	0.047	0.524	0.967	0.085	0.684	0.746	0.049	0.979	0.857	0.413	0.06	0.254	0.258	0.07	0.077	0.195	0.376	0.016	0.629
%Sync	Pearson Correlation	0.565	0.095	0.173	0.185	1	0.749	-0.042	0.874	-0.51	0.162	-0.522	0.396	-0.004	-0.493	0.395	0.398	-0.445	0.083	-0.385	0.795	0.548	0.496	0.395	0.553	0.642	0.523	0.207	-0.226	0.044
	Sig. (2-tailed)	0.056	0.769	0.611	0.564		0.005	0.896	0	0.09	0.614	0.082	0.203	0.991	0.103	0.204	0.2	0.147	0.799	0.217	0.002	0.065	0.101	0.204	0.062	0.024	0.081	0.518	0.481	0.892
RR_LOS	Pearson Correlation	0.083	0.338	0.412	0.213	0.749	1	-0.496	0.945	-0.366	0.45	-0.443	0.829	0.479	-0.37	0.247	0.291	-0.503	0.484	-0.098	0.854	0.484	0.284	0.163	0.563	0.733	0.695	-0.062	-0.48	-0.325
	Sig. (2-tailed)	0.799	0.283	0.208	0.507	0.005		0.101	0	0.241	0.142	0.149	0.001	0.115	0.237	0.439	0.359	0.095	0.111	0.762	0	0.111	0.372	0.612	0.056	0.007	0.012	0.849	0.115	0.303
Q_LOS	Pearson Correlation	0.484	-0.098	-0.072	0.242	-0.042	-0.496	1	-0.312	-0.223	-0.39	-0.016	-0.679	-0.687	-0.112	-0.132	-0.203	0.24	-0.434	-0.107	-0.261	-0.014	0.349	0.299	-0.191	-0.289	-0.589	0.571	0.318	0.623
	Sig. (2-tailed)	0.111	0.762	0.833	0.448	0.896	0.101		0.323	0.486	0.21	0.96	0.015	0.014	0.728	0.682	0.528	0.452	0.159	0.741	0.413	0.965	0.266	0.345	0.553	0.363	0.044	0.053	0.313	0.031
PEAK_LOS	Pearson Correlation	0.286	0.261	0.279	0.204	0.874	0.945	-0.312	1	-0.393	0.304	-0.55	0.669	0.285	-0.487	0.311	0.337	-0.553	0.317	-0.206	0.933	0.584	0.402	0.258	0.628	0.709	0.652	0.094	-0.37	-0.199
	Sig. (2-tailed)	0.368	0.413	0.406	0.526	0	0	0.323		0.206	0.337	0.064	0.017	0.37	0.109	0.325	0.285	0.062	0.315	0.52	0	0.046	0.196	0.419	0.029	0.01	0.022	0.771	0.237	0.534
Tau	Pearson Correlation	-0.604	-0.351	-0.449	-0.691	-0.51	-0.366	-0.223	-0.393	1	-0.127	0.543	-0.328	-0.041	0.559	-0.405	-0.28	0.342	-0.038	0.186	-0.379	-0.561	-0.694	-0.638	-0.46	-0.718	-0.466	-0.56	0.442	-0.252
	Sig. (2-tailed)	0.037	0.263	0.166	0.013	0.09	0.241	0.486	0.206		0.694	0.068	0.298	0.898	0.059	0.192	0.378	0.276	0.907	0.563	0.225	0.058	0.012	0.026	0.132	0.009	0.126	0.058	0.15	0.43
S-RR	Pearson Correlation	0.107	-0.271	-0.2	-0.208	0.162	0.45	-0.39	0.304	-0.127	1	0.45	0.481	0.568	0.504	0.365	0.541	0.177	0.185	-0.092	0.102	-0.399	-0.049	-0.189	-0.391	0.344	0.055	-0.19	-0.289	-0.2
	Sig. (2-tailed)	0.74	0.394	0.556	0.517	0.614	0.142	0.21	0.337	0.694		0.142	0.113	0.054	0.095	0.243	0.069	0.582	0.565	0.776	0.753	0.199	0.879	0.557	0.209	0.274	0.864	0.555	0.362	0.533
S-LAM-V	Pearson Correlation	-0.259	-0.539	-0.495	-0.582	-0.522	-0.443	-0.016	-0.55	0.543	0.45	1	-0.306	0.074	0.971	-0.205	-0.004	0.781	-0.093	0.095	-0.706	-0.997	-0.575	-0.646	-0.967	-0.516	-0.628	-0.504	0.229	-0.129
	Sig. (2-tailed)	0.417	0.071	0.122	0.047	0.082	0.149	0.96	0.064	0.068	0.142		0.333	0.819	0	0.523	0.991	0.003	0.774	0.769	0.01	0	0.051	0.023	0	0.086	0.029	0.094	0.474	0.689
S-TT-V	Pearson Correlation	-0.075	0.348	0.533	0.204	0.396	0.829	-0.679	0.669	-0.328	0.481	-0.306	1	0.839	-0.273	0.009	0.045	-0.303	0.773	0.327	0.565	0.345	-0.017	-0.099	0.444	0.566	0.639	-0.183	-0.511	-0.438
	Sig. (2-tailed)	0.818	0.268	0.091	0.524	0.203	0.001	0.015	0.017	0.298	0.113	0.333		0.001	0.39	0.979	0.889	0.339	0.003	0.3	0.056	0.272	0.958	0.759	0.148	0.055	0.025	0.57	0.089	0.154
S-MaxVL	Pearson Correlation	-0.126	0.12	0.296	-0.013	-0.004	0.479	-0.687	0.285	-0.041	0.568	0.074	0.839	1	0.091	-0.135	-0.083	0.007	0.744	0.587	0.186	-0.039	-0.34	-0.437	0.052	0.16	0.28	-0.314	-0.311	-0.463
	Sig. (2-tailed)	0.697	0.709	0.376	0.967	0.991	0.115	0.014	0.37	0.898	0.054	0.819	0.001		0.777	0.675	0.798	0.984	0.006	0.045	0.562	0.904	0.28	0.156	0.873	0.619	0.378	0.32	0.326	0.129
S-LAM-H	Pearson Correlation	-0.31	-0.447	-0.52	-0.518	-0.493	-0.37	-0.112	-0.487	0.559	0.504	0.971	-0.273	0.091	1	-0.058	0.122	0.61	-0.183	-0.036	-0.637	-0.972	-0.599	-0.649	-0.916	-0.404	-0.527	-0.583	0.076	-0.272
	Sig. (2-tailed)	0.327	0.145	0.101	0.085	0.103	0.237	0.728	0.109	0.059	0.095	0	0.39	0.777		0.857	0.705	0.035	0.569	0.911	0.026	0	0.04	0.022	0	0.193	0.078	0.047	0.814	0.392
S-TT-H	Pearson Correlation	0.401	-0.105	-0.357	0.132	0.395	0.247	-0.132	0.311	-0.405	0.365	-0.205	0.009	-0.135	-0.058	1	0.95	-0.528	-0.605	-0.802	0.303	0.223	0.429	0.532	0.167	0.631	0.386	0.276	-0.344	0.071
	Sig. (2-tailed)	0.197	0.746	0.281	0.684	0.204	0.439	0.682	0.325	0.192	0.243	0.523	0.979	0.675	0.857		0	0.078	0.037	0.002	0.339	0.486	0.164	0.075	0.604	0.028	0.215	0.386	0.274	0.826
S-MaxHL	Pearson Correlation	0.345	-0.305	-0.482	-0.105	0.398	0.291	-0.203	0.337	-0.28	0.541	-0.004	0.045	-0.083	0.122	0.95	1	-0.332	-0.53	-0.794	0.259	0.033	0.334	0.403	-0.015	0.581	0.301	0.168	-0.263	0.062
	Sig. (2-tailed)	0.273	0.335	0.133	0.746	0.2	0.359	0.528	0.285	0.378	0.069	0.991	0.889	0.798	0.705	0		0.291	0.076	0.002	0.417	0.919	0.289	0.194	0.964	0.047	0.342	0.601	0.408	0.848
S-LAM V-H	Pearson Correlation	-0.049	-0.621	-0.308	-0.578	-0.445	-0.503	0.24	-0.553	0.342	0.177	0.781	-0.303	0.007	0.61	-0.528	-0.332	1	0.171	0.41	-0.68	-0.767	-0.342	-0.449	-0.817	-0.656	-0.705	-0.151	0.562	0.283
	Sig. (2-tailed)	0.881	0.031	0.356	0.049	0.147	0.095	0.452	0.062	0.276	0.582	0.003	0.339	0.984	0.035	0.078	0.291		0.596	0.185	0.015	0.004	0.277	0.143	0.001	0.02	0.01	0.64	0.057	0.372
S-TT V-H	Pearson Correlation	-0.243	0.231	0.591	0.009	0.083	0.484	-0.434	0.317	-0.038	0.185	-0.093	0.773	0.744	-0.183	-0.605	-0.53	0.171	1	0.77	0.233	0.122	-0.225	-0.345	0.21	0.023	0.223	-0.238	-0.087	-0.262
	Sig. (2-tailed)	0.446	0.471	0.055	0.979	0.799	0.111	0.159	0.315	0.907	0.565	0.774	0.003	0.006	0.569	0.037	0.076	0.596		0.003	0.466	0.707	0.482	0.271	0.513	0.942	0.486	0.456	0.789	0.41
S-Max L V-H	Pearson Correlation	-0.194	0.08	0.367	-0.058	-0.385	-0.098	-0.107	-0.206	0.186	-0.092	0.095	0.327	0.587	-0.036	-0.802	-0.794	0.41	0.77	1	-0.182	-0.091	-0.37	-0.486	-0.067	-0.489	-0.239	-0.114	0.248	-0.069
	Sig. (2-tailed)	0.545	0.805	0.267	0.857	0.217	0.762	0.741	0.52	0.563	0.776	0.769	0.3	0.045	0.911	0.002	0.002	0.185	0.003		0.571	0.779	0.236	0.109	0.836	0.107	0.454	0.724	0.437	0.832
R-RR	Pearson Correlation	0.248	0.364	0.372	0.261	0.795	0.854	-0.261	0.933	-0.379	0.102	-0.706	0.565	0.186	-0.637	0.303	0.259	-0.68	0.233	-0.182	1	0.734	0.546	0.394	0.77	0.652	0.691	0.183	-0.263	-0.124
	Sig. (2-tailed)	0.438	0.245	0.259	0.413	0.002	0	0.413	0	0.225	0.753	0.01	0.056	0.562	0.026	0.339	0.417	0.015	0.466	0.571		0.007	0.066	0.205	0.003	0.022	0.013	0.569	0.409	0.7
R-LAM-V	Pearson Correlation	0.274	0.51	0.485	0.556	0.548	0.484	-0.014	0.584	-0.561	-0.399	-0.997	0.345	-0.039	-0.972	0.223	0.033	-0.767	0.122	-0.091	0.734	1	0.606	0.669	0.965	0.535	0.644	0.523	-0.212	0.153
	Sig. (2-tailed)	0.388	0.09	0.131	0.06	0.065	0.111	0.965	0.046	0.058	0.199	0	0.272	0.904	0	0.486	0.919	0.004	0.707	0.779	0.007		0.037	0.017	0	0.073	0.024	0.081	0.508	0.636
R-TT-V	Pearson Correlation	0.511	0.14	0.25	0.357	0.496	0.284	0.349	0.402	-0.694	-0.049	-0.575	-0.017	-0.34	-0.599	0.429	0.334	-0.342	-0.225	-0.37	0.546	0.606	1	0.889	0.462	0.496	0.332	0.717	0.057	0.558
	Sig. (2-tailed)	0.089	0.664	0.458	0.254	0.101	0.372	0.266	0.196	0.012	0.879	0.051	0.958	0.28	0.04	0.164	0.289	0.277	0.482	0.236	0.066	0.037		0	0.13	0.101	0.291	0.009	0.861	0.06
R-MaxVL	Pearson Correlation	0.414	0.097	0.129	0.355	0.395	0.163	0.299	0.258	-0.638	-0.189	-0.646	-0.099	-0.437	-0.649	0.532	0.403	-0.449	-0.345	-0.486	0.394	0.669	0.889	1	0.515	0.465	0.317	0.778	0.045	0.636
	Sig. (2-tailed)	0.181	0.763	0.705	0.258	0.204	0.612	0.345	0.419	0.026	0.557	0.023	0.759	0.156	0.022	0.075	0.194	0.143	0.271	0.109	0.205	0.017	0		0.087	0.128	0.315	0.003	0.889	0.026
R-LAM-H	Pearson Correlation	0.11	0.615	0.565	0.54	0.553	0.563	-0.191	0.628	-0.46	-0.391	-0.967	0.444	0.052	-0.916	0.167	-0.015	-0.817	0.21	-0.067	0.77	0.965	0.462	0.515	1	0.567	0.76	0.283	-0.322	-0.079
	Sig. (2-tailed)	0.733	0.033	0.07	0.07	0.062	0.056	0.553	0.029	0.132	0.209	0	0.148	0.873	0	0.604	0.964	0.001	0.513	0.836	0.003	0	0.13	0.087		0.055	0.004	0.374	0.308	0.807
R-TT-H	Pearson Correlation	0.207	0.455	0.366	0.528	0.642	0.733	-0.289	0.709	-0.718	0.344	-0.516	0.566	0.16	-0.404	0.631	0.581	-0.656	0.023	-0.489	0.652	0.535	0.496	0.465	0.567	1	0.822	0.114	-0.752	-0.254
	Sig. (2-tailed)	0.518	0.137	0.269	0.077	0.024	0.007	0.363	0.01	0.009	0.274	0.086	0.055	0.619	0.193	0.028	0.047	0.02	0.942	0.107	0.022	0.073	0.101	0.128	0.055		0.001	0.724	0.005	0.426
R-MaxHL	Pearson Correlation	-0.075	0.562	0.478	0.402	0.523	0.695	-0.589	0.652	-0.466	0.055	-0.628	0.639	0.28	-0.527	0.386	0.301	-0.705	0.223	-0.239	0.691	0.644	0.332	0.317	0.76	0.822	1	-0.115	-0.605	-0.432
	Sig. (2-tailed)	0.818	0.057	0.137	0.195	0.081	0.012	0.044	0.022	0.126	0.864	0.029	0.025	0.378	0.078	0.215	0.342	0.01	0.486	0.454	0.013	0.024	0.291	0.315	0.004	0.001		0.722	0.037	0.161
R-LAM V-H	Pearson Correlation	0.649	-0.133	-0.076	0.281	0.207	-0.062	0.571	0.094	-0.56	-0.19	-0.504	-0.183	-0.314	-0.583	0.276	0.168	-0.151	-0.238	-0.114	0.183	0.523	0.717	0.778	0.283	0.114	-0.115	1	0.271	0.82
	Sig. (2-tailed)	0.022	0.681	0.824	0.376	0.518	0.849	0.053	0.771	0.058	0.555	0.094	0.57	0.32	0.047	0.386	0.601	0.64	0.456	0.724	0.569	0.081	0.009	0.003	0.374	0.724	0.722		0.394	0.001
R-TT V-H	Pearson Correlation	0.115	-0.683	-0.455	-0.674	-0.226	-0.48	0.318	-0.37	0.442	-0.289	0.229	-0.511	-0.311	0.076	-0.344	-0.263	0.562	-0.087	0.248	-0.263	-0.212	0.057	0.045	-0.322	-0.752	-0.605	0.271	1	0.671
	Sig. (2-tailed)	0.723	0.014	0.16	0.016	0.481	0.115	0.313	0.237	0.15	0.362	0.474	0.089	0.326	0.814	0.274	0.408	0.057	0.789	0.437	0.409	0.508	0.861	0.889	0.308	0.005	0.037	0.394		0.017
R-Max L V-H	Pearson Correlation	0.522	-0.502	-0.27	-0.156	0.044	-0.325	0.623	-0.199	-0.252	-0.2	-0.129	-0.438	-0.463	-0.272	0.071	0.062	0.283	-0.262	-0.069	-0.124	0.153	0.558	0.636	-0.079	-0.254	-0.432	0.82	0.671	1
	Sig. (2-tailed)	0.082	0.096	0.423	0.629	0.892	0.303	0.031	0.534	0.43	0.533	0.689	0.154	0.129	0.392	0.826	0.848	0.372	0.41	0.832	0.7	0.636	0.06	0.026	0.807	0.426	0.161	0.001	0.017

## Sheet: Data
Subject #	Sex	Age in months	Kindergarten or 1st grade	Math score (national standardized test)	Language score (national standardized test)	Average skill level previous measurements	Maximum score previous measurements	%Sync	RR_LOS	Q_LOS	PEAK_LOS	Tau	S tier-RR	S tier-LAM-V	S tier -TT-V	S tier-MaxVL	S tier-LAM-H	S tier-TT-H	S tier-MaxHL	S tier-LAM V-H	S tier-TT V-H	S tier-Max L V-H	R tier-RR	R tier-LAM-V	R tier-TT-V	R tier-MaxVL	R tier-LAM-H	R tier-TT-H	R tier-MaxHL	R tier-LAM V-H	R tier-TT V-H	R tier-Max L V-H
1	M	58	K	5		2.64575	5	0.0191898	0.0215289	0.495286	0.0555556	18	0.00867426	0.669239	7.57143	21	0.594879	3.2	7	0.0743599	0.405836	0.5	0.00428712	0.31638	3.14286	5	0.314626	3.9	7	0.00175377	-0.107505	-0.166667
2	M	55	K	5	5	2.27217	4	0.0280612	0.0266434	0.577043	0.0891365	16	0.00566821	0.288792	8.25	19	0.225513	2.5	3	0.0632784	0.534884	0.727273	0.0136662	0.706833	5.83333	9	0.659711	4.66667	10	0.0471222	0.111111	-0.0526316
3	M	60	K	2	3	0.77444	4	0.00967742	0.00391219	0.912235	0.0149254	54	0.00419355	0.960591	4.28571	12	0.687192	2.25	3	0.273399	0.311475	0.6	3.12175e-05	0.00738916	3	3	0	0	1	0.00738916	1	0.5
4	F	58	K	5	5	2.5549	4	0.0752941	0.0224053	0.982032	0.0761905	2	0.000797232	0.0723982	6	6	0.0482655	3.2	7	0.0241327	0.304348	-0.0769231	0.0102145	0.927602	7.5	26	0.837104	5.28571	11	0.0904977	0.173184	0.405405
5	F	55	K	5	4	2.44819	4	0.002	0.00219419	1.30925	0.0117096	36	0.001536	0.732824	3.2	5	0.671756	3.14286	6	0.0610687	0.00900901	-0.0909091	0.00056	0.160305	3	3	0.229008	3	5	-0.0687023	0	-0.25
6	M	64	1st	4	5	2.31381	4	0.032381	0.0154247	1.27709	0.0344828	-1	0.00939683	0.91476	6.7	16	0.671587	2.6	5	0.243173	0.44086	0.52381	0.000435374	0.0420664	4.75	7	0.0295203	4	4	0.0125461	0.0857143	0.272727
7	F	64	1st	5	5	2.56155	4	0.0359712	0.0130184	0.483801	0.0390173	-1	0.00293774	0.30759	7	18	0.248114	3.25	5	0.0594763	0.365854	0.565217	0.00639097	0.671105	5.33333	11	0.674212	4.42857	12	-0.00310697	0.0926829	-0.0434783
8	M	69	1st	4	4	2.42001	4	0.0334448	0.00654493	1.64747	0.0335008	0	0.00413866	0.720779	4.33333	8	0.47952	2.66667	4	0.241259	0.238095	0.333333	0.00145972	0.251748	7	12	0.144855	3.33333	5	0.106893	0.354839	0.411765
9	F	76	1st	4	4	2.27193	4	0.139721	0.0343236	0.90394	0.14	0	0.00745814	0.290353	7.6	15	0.266953	3.90909	15	0.0234002	0.320695	0	0.0175697	0.702006	5.83333	10	0.657434	5.9	10	0.0445718	-0.00568182	0
10	F	69	1st	3	3	1.98329	4	0.0439189	0.0144577	0.91814	0.0526316	-1	0.00960441	0.603226	5.1	10	0.539247	5.36364	27	0.0639785	-0.0251955	-0.459459	0.00631734	0.396774	8.2	25	0.249821	5.66667	8	0.146953	0.182692	0.515152
11	F	73	1st	4	4	2.75456	5	0.0204499	0.00233646	1.7841	0.0205761	-1	0.000376378	0.191781	4.66667	10	0.10274	3	3	0.0890411	0.217391	0.538462	0.00145533	0.767123	5.6	18	0.52968	2.66667	3	0.237443	0.354839	0.714286
12	M	71	1st	5	5	2.79102	5	0.0672043	0.0182755	1.65903	0.0731707	-1	0.00346861	0.197775	5	9	0.160692	3.25	5	0.0370828	0.212121	0.285714	0.0140695	0.802225	9.83333	24	0.632056	3.71429	6	0.170169	0.45167	0.6
